# Supplementary material
Source: PubMed Central journal article supplement (PMC2815089)
Supplement: NIHMS140390-supplement-01.pdf [file NIHMS140390-supplement-01.pdf]

## **Supplemental Material**

### **Working Memory Deficits Predict Short-term Smoking Resumption Following Brief Abstinence**

Freda Patterson, Christopher Jepson, James Loughhead, Kenneth Perkins, Andrew A. Strasser, Steven Siegel, Joseph Frey, Ruben Gur, Caryn Lerman.

This material supplements, but does not replace, the content of the peer-reviewed paper published in Drug and Alcohol Dependence

#### **Neurocognitive Task Descriptions**

In the P-CPT, participants are required to respond with a button press whenever lines on the screen form a complete letter. Sixty targets and 120 foils were presented (median completion time 3 min). In the Letter-N-Back task, sequences of letters are displayed and participants are required to respond with a button press to a single target using the following rules: during 1-back trials, participants respond if the letter is identical to the one preceding it, in 2-back trials, they respond if the letter is identical to the one two letters back, etc. As a target detection task, 0-back trials (in which the participant simply responds to each occurrence of a given letter) are also included. Fifteen targets and 30 foils were presented for each of the N-back conditions (0-back – 3-back).
